# Supplementary material
Source: PubMed Central journal article supplement (PMC1794057)
Supplement: blood_blood-2006-08-042747_1.pdf [file blood_blood-2006-08-042747_1.pdf]

|                 | <u>conventional</u> |             |              | <u>novel</u> |                |              | <u>atypical</u> |             | <u>other</u> |
|-----------------|---------------------|-------------|--------------|--------------|----------------|--------------|-----------------|-------------|--------------|
|                 | PKC $\alpha$        | PKC $\beta$ | PKC $\gamma$ | PKC $\delta$ | PKC $\epsilon$ | PKC $\theta$ | PKC $\zeta$     | PKC $\iota$ | PKC $\mu$    |
| <b>MM.1S</b>    | ++                  | ++          | +            | ++           | ++             | +            | ++              | ++          | +            |
| <b>MM.1R</b>    | ++                  | +           | -            | ++           | +              | -            | +               | ++          | +            |
| <b>RPMI</b>     | +                   | +           | -            | ++           | ++             | -            | +               | ++          | +            |
| <b>Dox40</b>    | +                   | +           | -            | +            | ++             | +            | +               | ++          | +            |
| <b>LR5</b>      | ++                  | ++          | ++           | ++           | ++             | ++           | +               | ++          | +            |
| <b>U266</b>     | ++                  | ++          | +            | +            | +              | -            | ++              | ++          | +            |
| <b>OPM1</b>     | ++                  | ++          | +            | ++           | ++             | ++           | ++              | ++          | ++           |
| <b>OPM2</b>     | +++                 | ++          | +            | +++          | ++             | ++           | +++             | ++          | ++           |
| <b>NCI H929</b> | +                   | ++          | +            | ++           | +              | ++           | ++              | ++          | ++           |
| <b>KMS11</b>    | +                   | ++          | +            | ++           | +              | ++           | ++              | ++          | +            |
| <b>INA6</b>     | +                   | +           | +            | ++           | +              | +            | +               | ++          | ++           |
| <b>MM-Pat</b>   | ++                  | ++          | +            | ++           | ++             | -            | +               | ++          | +            |
